32 **Abstract**

33 The Golgi complex is a membranous organelle located in the heart of the eukaryotic secretory  
34 pathway. A subfamily of the Golgi matrix proteins, called GRASPs, are key players in the stress-  
35 induced unconventional secretion, the Golgi dynamics during mitosis/apoptosis, and Golgi ribbon  
36 formation. The Golgi ribbon is vertebrate-specific and correlates with the appearance of two  
37 GRASP paralogs (GRASP55/GRASP65) and two coiled-coil Golgins (GM130/Golgin45), which  
38 interact with each other *in vivo*. Although essential for the Golgi ribbon formation and the increase  
39 in Golgi structural complexity, the molecular details leading to their appearance only in this  
40 subphylum are still unknown. Moreover, despite the new functionalities supported by the GRASP  
41 paralogy, little is known about the structural and evolutionary differences between these  
42 paralogues. In this context, we used ancestor sequence reconstruction and several  
43 biophysical/biochemical approaches to assess the evolution of the GRASP structure, flexibility,  
44 and how they started anchoring their Golgin partners. Our data showed that the Golgins appeared  
45 in evolution and were anchored by the single GRASP ancestor before *gorasp* gene duplication  
46 and divergence in Metazoans. After the *gorasp* divergence, variations inside the GRASP binding  
47 pocket determined which paralogue would recruit each Golgin partner (GRASP55 with Golgin45  
48 and GRASP65 with GM130). These interactions are responsible for the protein's specific Golgi  
49 locations and the appearance of the Golgi ribbon. We also suggest that the capacity of GRASPs  
50 to form supramolecular structures is a long-standing feature, which likely affects GRASP's  
51 participation as a trigger of the stress-induced secretory pathway.

52

53

54

55

56

57

58

59

60 **Keyword:** Ancestor Sequence Reconstruction; GRASP55/GRASP65; Golgins; Golgi Ribbon;  
61 Unconventional Protein Secretion

62

## 63 Introduction

64 The classical secretory pathway is the most important delivery system in eukaryotic cells.  
65 It is responsible for carrying a nascent protein from inside the endoplasmic reticulum (ER)  
66 towards the Golgi complex and then its final destination. This orchestrated transport was first  
67 described by the Nobel Prize winner George Palade [1], and since then, it has been a subject of  
68 intense studies. Surprisingly, although this *ER-Golgi-Final Destination* pathway is the best  
69 known and characterized secretion pathway in eukaryotes, it is not the only one [2]. Recently,  
70 many proteins were observed to be transported through pathways that do not require some, if any,  
71 of the classical machinery components [2]. There is still not a clear common feature to all these  
72 alternative delivery systems, but they have been all together classified as Unconventional Protein  
73 Secretion (UPS) pathways.

74 A possible common point for these UPS pathways seems to be its stress-triggered  
75 mechanism, including nutrient starvation [3], temperature [4], and ER stress [5]. Some proteins  
76 targeted to UPS are translocated into the ER but somehow travel to their final destinations  
77 bypassing the Golgi complex (Type IV UPS) [6,7]. Other proteins are soluble and dispersed in the  
78 crowded cytosol but recruited to the UPS pathway to perform additional functionalities outside  
79 the cell without the direct participation of the ER or the Golgi (Type III UPS) [3,8]. Others are  
80 directly transported across the membrane by specific ABC transporters (Type II UPS) or by pore-  
81 mediated translocation (Type I UPS). Moreover, there might still be other pathways for protein  
82 delivery, illustrating the magnificent complexity of protein transport in eukaryotic cells [2]. UPS  
83 in eukaryotes is an emergent theme, and several proteins that are directly transported by these  
84 pathways have been implicated in distinct excretion mechanisms and multiple human illnesses,  
85 including cystic fibrosis [6], Alzheimer's disease [9], and diseases arising from inflammation [10].

86 A common point between Types III and IV UPS and the classical secretory pathway is  
87 the involvement of a Golgi matrix protein family called Golgi Reassembly and Stacking Proteins  
88 (GRASPs) [11-14]. GRASPs constitute a family of peripheral membrane-associated proteins, which  
89 were first suggested as an essential factor in the Golgi cisternae reassembly after mitotic times  
90 [15,16]. GRASPs are observed in all the branches of the eukaryotic tree of life, although not equally  
91 spread in all supergroups [17]. In Metazoans, evolution led to the appearance of two GRASP  
92 paralogue genes called *gorasp1* and *gorasp2* (translating the proteins GRASP65 and GRASP55,  
93 respectively) [18]. GRASP65 is anchored to the cell membrane through the myristoylation of its  
94 glycine-2. The interaction with a protein partner, GM130, seems to determine its orientation at  
95 the membrane surface [19,20]. This direct interaction was suggested to be the main responsible for  
96 the preferential *cis*-Golgi attachment of GRASP65 [19]. On the other hand, GRASP55 can be  
97 myristoylated and palmitoylated *in vivo* and is localized in the *medial/trans*-Golgi through the  
98 interaction with Golgin45 [21]. GRASP55 and 65 are necessary to anchor GM130 and Golgin45

99 to the Golgi. Moreover, these four proteins are also essential for the formation and integrity of the  
100 Golgi ribbon [22,23]. Although membrane anchoring has proved essential for GRASP tethering,  
101 the general occurrence of myristoylation in eukaryotes besides mammals remains obscure.

102 GRASPs are structurally organized in two main portions. The N-terminal one, called the  
103 GRASP domain (DGRASP), is formed by two PDZ subdomains with an unusual circular  
104 permutation in eukaryotes, making them resemble prokaryotic PDZs [24]. The PDZs are connected  
105 in tandem to allow rigid body reorganization, facilitating their interaction with multiple different  
106 protein partners [25]. This promiscuity for interaction with several different protein partners and  
107 their unusual structural plasticity [26,27] might be the convergent features of GRASPs in different  
108 cell functional tasks, including as anchoring factors of Golgins [12,15,23], their direct participation  
109 in Golgi dynamics during mitotic and apoptotic times [28-30] and their self-association during stress  
110 conditions triggering UPS [4,31]. It comes as quite a surprise that there is still a significant gap in  
111 understanding how GRASPs can perform those functionalities. The second portion of the  
112 GRASP's structure, the so-called Serine and Proline-Rich (SPR) domain, has a regulatory  
113 function [15] and presents a very low sequence identity even for closely related species [25].  
114 Despite the lack of experimental data on the structure of the SPR, previous computational analyses  
115 suggested it as fully disordered for most systems [26].

116 One current debate about GRASPs concerns whether they are essential for Golgi cisternae  
117 stacking [23]. Rothman and co-workers observed that several different tethering factors  
118 synergically work in the Golgi organization [32], thus suggesting that GRASPs share the  
119 protagonism in the Golgi maintenance with other proteins. On the other hand, upon cell treatment  
120 with brefeldin A, the Golgi membrane and its oligosaccharide-modifying enzymes relocate to the  
121 ER. In contrast, the Golgins and GRASPs accumulate in the cytoplasm keeping their ability to  
122 form a ribbon-like reticulum [33]. This suggests that Golgins and GRASPs would be sufficient for  
123 the Golgi structuration. Furthermore, Golgins have recently been shown to undergo liquid-liquid  
124 phase separation when overexpressed [34,35] and GRASPs to form amyloid-like fibrils [36]. Those  
125 pieces of information suggest that the participation of the Golgi-matrix proteins in the Golgi  
126 organization might be revisited. More specifically, how would the synergy between GRASPs and  
127 the other Golgi matrix proteins facilitate the Golgi organization, and, considering that the Golgi  
128 is an ancient organelle, how old would this type of self-association be?

129 The complexity of life lies in the fate of evolution. The first eukaryotic species to arise in  
130 history is still a matter of debate. However, estimates for the Last Eukaryote Common Ancestor  
131 (LECA) age range from 1–1.9 billion years ago [37]. The tree of life spreads through different  
132 kingdoms, and each branch differentiates itself so that the phenotype similarities are somehow  
133 hard to identify in most cases. Nevertheless, the genotype still carries some traces of that first

134 eukaryote representative. Interestingly, although a Golgi with differentiated compartments and  
135 trafficking pathways directly relates to the Eukaryogenesis, GRASPs are one of the few Golgi-  
136 matrix proteins predicted to be present in LECA [38]. Here, we used ancestor sequence  
137 reconstruction and several biophysical/biochemical tools to gain insight into GRASP ancient  
138 proteins and compare them with modern human relatives. The GRASP ancestors were used to  
139 understand three points that are fundamental for Golgi ribbon formation and cell-stress responses  
140 in UPS: when and how GRASPs started recruiting their Golgins to the Golgi; how the GRASP  
141 structure has evolved to make them a hub in the protein interactome; and how disorder, flexibility,  
142 and self-association (under stress) have developed in the modern human orthologues.

143

## 144 **Results**

### 145 *Resurrecting ancient proteins to unravel GRASP history*

146 Our phylogenetic analyses started by collecting GRASP orthologues in several branches  
147 of the eukaryotic tree and predicting the corresponding GRASP domain for each one of them. We  
148 excluded the disordered SPR region from the analyses because of its low sequence identity, even  
149 in closely related species [12,26]. For the ancestor sequence reconstruction, a high-quality sequence  
150 alignment is mandatory. After the analyses, the GRASP tree with the highest probability reflected  
151 the different separations of clades of eukaryotes (Figure S1), thus showing the robustness of the  
152 constructed evolutionary tree. The first reconstructed node of the GRASP history was the  
153 connection between the GRASP55 and GRASP65 inside the Metazoa kingdom (Figure 1A). This  
154 first ancestor (ANC1) would represent the GRASP from the first Metazoan to appear in the  
155 evolution, based on the used methodology and database. The second ancestor (ANC2) was built  
156 based on the node connecting the Metazoa with the Fungi kingdom, suggesting a GRASP from  
157 the first representative of the Opisthokonta group (Figure 1A). The third ancestor (ANC3) was  
158 built based on the connection of the subgroup used to reconstruct the ANC2 with representatives  
159 from the Amoebozoa taxonomic group (Figure 1A). ANC3 would be a GRASP sequence  
160 representing the approximate point of the Unikonts/Bikonts divergence. The ancestor four  
161 (ANC4) was built based on the whole group used to construct ANC3 plus representatives from  
162 the SAR+Haptophyta (Figure 1A). This was the closest to LECA reconstructed with reasonable  
163 statistics for the predicted protein sequence (Figure S1). The sequence alignment between the  
164 ancestors and the modern human DGRASP55/65 suggested that all the ancestors kept the  
165 characteristic two-PDZ fold of DGRASPs (Figure 1B). In fact, the AlphaFold 2 (DeepMind)  
166 software retrieves models for the GRASP ancestors where the structural superposition with the  
167 crystallographic structures of GRASP55 and GRASP65 have a C $\alpha$  RMSD of less than 2.5 Å  
168 (Figure S2).

169  
170

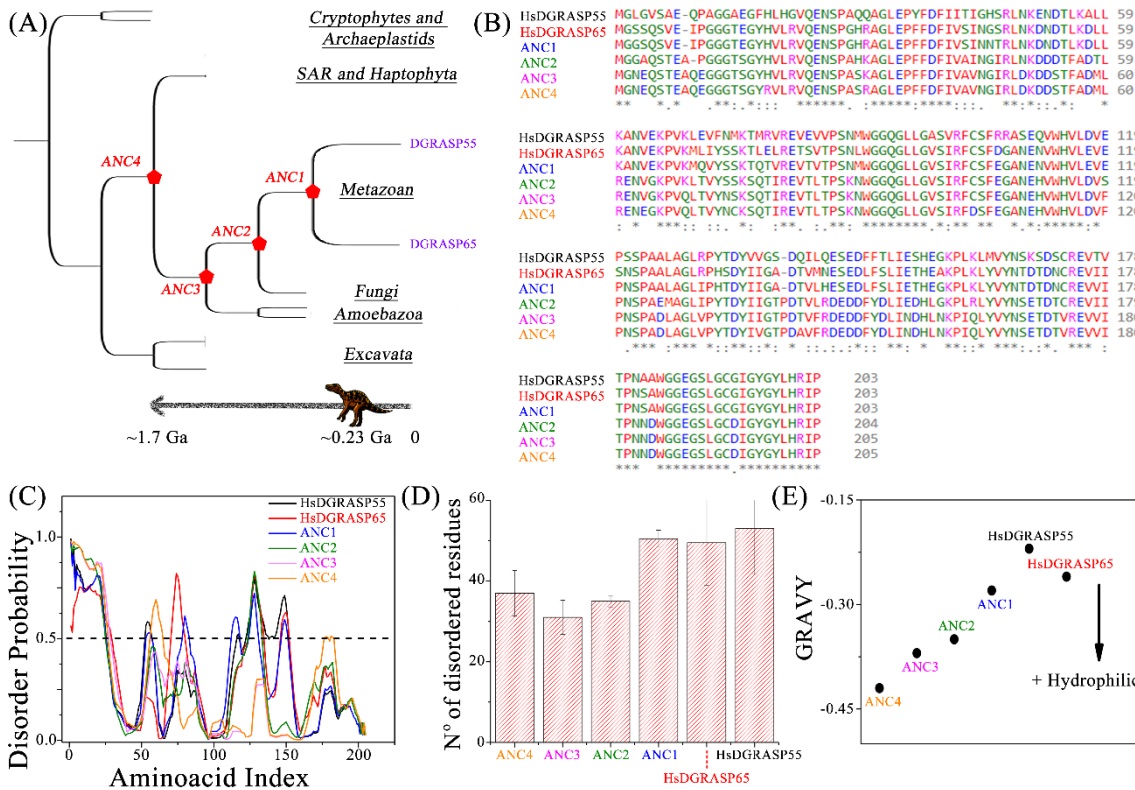

171

172 Figure 1. Phylogenetic and hydrodynamic characterization of the ancestor proteins compared with the  
 173 modern orthologues. (A) Phylogenetic tree of the eukaryotes highlighting the points where the theoretical  
 174 ancestor sequences would have appeared in evolution. (B) Sequence alignment between the reconstructed  
 175 ancestors and the modern human GRASP55 and GRASP65 sequences. (C) Disorder predictions using  
 176 PONDR VXL. A sequence with a final score higher than 0.5 is considered disordered. (D) The mean  
 177 number of residues predicted to be in intrinsically disordered regions calculated for each modern and  
 178 ancestor protein. The standard error is considered as a combination of the outputs of the PONDR VXL,  
 179 CAN\_XT, and VS2L software. (E) The grand average of hydropathy (GRAVY) value for each modern and  
 180 ancestor protein was determined as the sum of hydropathy values of all the amino acids divided by the  
 181 number of residues in the sequence [39]. The hydrophobicity of a protein increases with the GRAVY value.

182

183 The functional promiscuity of GRASPs has already been correlated with their high  
 184 structural flexibility in solution, primarily due to the massive presence of intrinsically disordered  
 185 regions (IDR) in their structures [17,26]. However, it has been experimentally demonstrated that,  
 186 in Metazoans, the presence of IDRs is a particular hallmark of DGRASP65 [17]. This raised the  
 187 hypothesis that the ancestor of GRASP55/65 should have characteristics similar to GRASP65,  
 188 especially regarding the presence of IDRs and the structural promiscuity at the tertiary structure  
 189 level [17]. We then repeated the search for IDRs in the ancestors to understand the presence of  
 190 IDRs throughout the evolution of GRASPs. Contrary to what we expected, our data indicated a  
 191 somewhat lower number of residues predicted to be in IDRs in ancient proteins, suggesting that  
 192 disorder is a modern feature (Figures 1C and D). However, these differences were rather related

193 to the extension of the conserved IDRs than to the appearance of new IDR regions during  
194 evolution (Figure 1C).

195 Going deeper into the disorder prediction, we analysed the ancestors and modern GRASP  
196 dynamics via predictions for the fast backbone movements directly from their amino acid  
197 sequences using DynaMine [40]. For all the tested proteins, a significant portion of the DGRASP  
198 core was classified as having “highly context-dependent dynamics”, suggesting that the cores can  
199 change depending on the physicochemical context where those proteins are inserted (Figure S3)  
200 [41]. Therefore, a significant portion of the DGRASP core is malleable, and its overall dynamic is  
201 adjusted depending on the environment, a property that goes back to the beginning of GRASP  
202 history.

203 Finally, the overall content of amino acids also suggested a tendency to decrease the total  
204 hydrophobicity. The grand average of hydropathy (GRAVY), calculated by adding the  
205 hydropathy value for each residue and dividing it by the length of the sequence [42], increased  
206 from the last ancestor to the human paralogues (Figure 1E). This indicates a decrease in protein  
207 solubility with evolution.

208

209 *The distribution of coevolving residues and frustration explains Metazoa’s GRASP-Golgin*  
210 *specificity*

211 The GRASP55/65 protein family presented a pattern of residue coevolution in which  
212 many highly conserved residues coevolved (to be referred to as Set 1, with 66 residues), together  
213 with seven smaller coevolving sets presenting 8, 7, 4, 3, 3, 2 and 2 residues, which are limited to  
214 specific sequences in this protein family. Set 1 included the residues involved in zinc binding  
215 (Cys102/103 and His17/18 in rat GRASP65/GRASP55), present in ANC1-3 but not in ANC4. In  
216 the latter, there was an arginine instead of the histidine and an aspartate instead of the cysteine,  
217 suggesting the zinc-binding site was not yet available in the early evolution of the GRASP55/65.  
218 ANC4 could present a salt bridge instead, as suggested in its structural model (Figure S4).

219 The larger coevolving set also included most residues involved in the binding to the Golgi  
220 matrix protein GM130 (His20, Trp113, Met164, Leu152, Gly138, His18, Val137, Leu143,  
221 Cys103, Arg101, Asp140, Val100, Ile142, Ser99, Ala98, Leu96, Gly97, and Gly94) and those  
222 involved in dimerization (Leu116, His200, Leu199, Tyr198, Arg201, Tyr196, Gly195, Gly188,  
223 Ile194, and Cys192). About half of the residues involved in GM130 recognition were present in  
224 all four ancestral sequences. This fact may explain why GRASP55 can bind GM130 *in vitro*,  
225 although with a much lower affinity [21]. A similar picture was found when analysing the  
226 prevalence of residues for the interaction with Golgin45, whose binding interface shared many of

227 the residues seen for the complex with GM130 (numbering refers to *Mus musculus* GRASP55,  
228 PDB ID 5H3J). Residues His18, Leu20, Ile37, Gly94, Leu96, Gly97, Val98, Ser99, Ile100,  
229 Arg101, Phe102, Cys103, Tyr164 and Arg174, necessary for the binding between GRASP55 and  
230 Golgin45, were all present in the larger set. Since GM130 and Golgin45 are Holozoa-specific  
231 proteins (present only in Metazoans and their single-celled relatives) and precede GRASP55/65  
232 duplication (which is Metazoa-specific) [38], their first appearance fits the expected time for  
233 ANC1. The conservation of residues found in Set 1 would thus entail ANC1 to bind to GM130  
234 and Golgin45. This was indeed found when we measured ANC1 binding to the mammalian  
235 GM130 and Golgin45 C-terminal region. The affinity strengths were similar to the values  
236 observed in the interaction of human GRASP55/65 with their respective Golgins (Figure 2A).

237 The evolution of the GRASP65/GM130 and GRASP55/Golgin45 complex formation had  
238 a milestone: the appearance of GM130 and Golgin45. Right after that appearance in the  
239 divergence of Holozans, the existing GRASP ancestor (ANC1) recruited the Golgins to the Golgi.  
240 The data in Figure 2A and the set of coevolving residues that came back from the LECA show  
241 that the molecular determinants of such recruitment were already present in GRASPs much before  
242 the appearance of those Golgins. In a second moment, GRASP paralogues appeared and evolved  
243 to the situation where GRASP55 (GRASP65) would recruit only Golgin45 (GM130). The overall  
244 conservation of the GRASP binding region in both Golgins shows that these regions did not  
245 diverge along with evolution (Figure S5). Therefore, it was the GRASPs that differentiated with  
246 time to recruit just one of the Golgins each. The high structural similarity of the GRASP's PDZs  
247 [17] indicates that the amino acid content and the relative orientation of the PDZs determined the  
248 GRASP-Golgin specificity.

249 Another interesting conservation is found after the analyses of the protein's frustration  
250 patterns. Sites with low local configurational frustration (green lines in Figure 2B) usually  
251 populate the hydrophobic core of folded proteins [43]. Maximally frustrated linkages (red lines in  
252 Figure 2B) often indicate biologically relevant regions, such as those involved in binding. For  
253 instance, frustrated local networks co-localize with regions implicated in forming oligomeric  
254 interfaces [47] and regions involved in allosteric transitions [44]. GRASPs and their ancestors  
255 showed a conserved high degree of frustration in the interactions within  $\alpha_2$  helix and the loop  
256 connecting  $\beta_1$  and  $\beta_2$  (Figure 2B and S6). The strand  $\beta_2$  and the helix  $\alpha_2$  form the binding groove  
257 of GRASP's PDZs [12,45,46]. Interestingly, the GRASP promiscuous interactome was previously  
258 suggested as a direct outcome of the somewhat low stability and high flexibility of the  $\alpha_2$  helix  
259 in the PDZ1, a region enriched in high configurational frustration (Figure 2B) [25].

260 The recruitment of GM130 and Golgin45 by GRASP65 and GRASP55, respectively,  
261 involves the PDZ1 binding pocket and the surface area of the cleft between PDZ1 and 2 (Figure



262 2C). The degree of frustration observed in the cleft between PDZ1 and PDZ2 is not similar when  
263 GRASP55 and GRASP65 structures are compared, showing that GRASP65 behaves more like  
264 the ancestor ANC1 (Figure 2B). When the degree of evolutionary conservation was mapped onto  
265 the GRASP55 and GRASP65 structures, the binding pocket of PDZ1 showed the highest  
266 variability, particularly in the  $\alpha_2$  helix and its surroundings (Figure 2C). This coincided with the  
267 maximally frustrated region seen in that helix (Figure 2B). Therefore, even though ANC1 could  
268 recruit both Golgins to the Golgi apparatus, evolution determined which GRASP paralogue would  
269 recruit which Golgin based on a differential evolutionary pressure acting in the PDZ1 binding  
270 pocket and the surface cleft between PDZ1 and PDZ2.

271

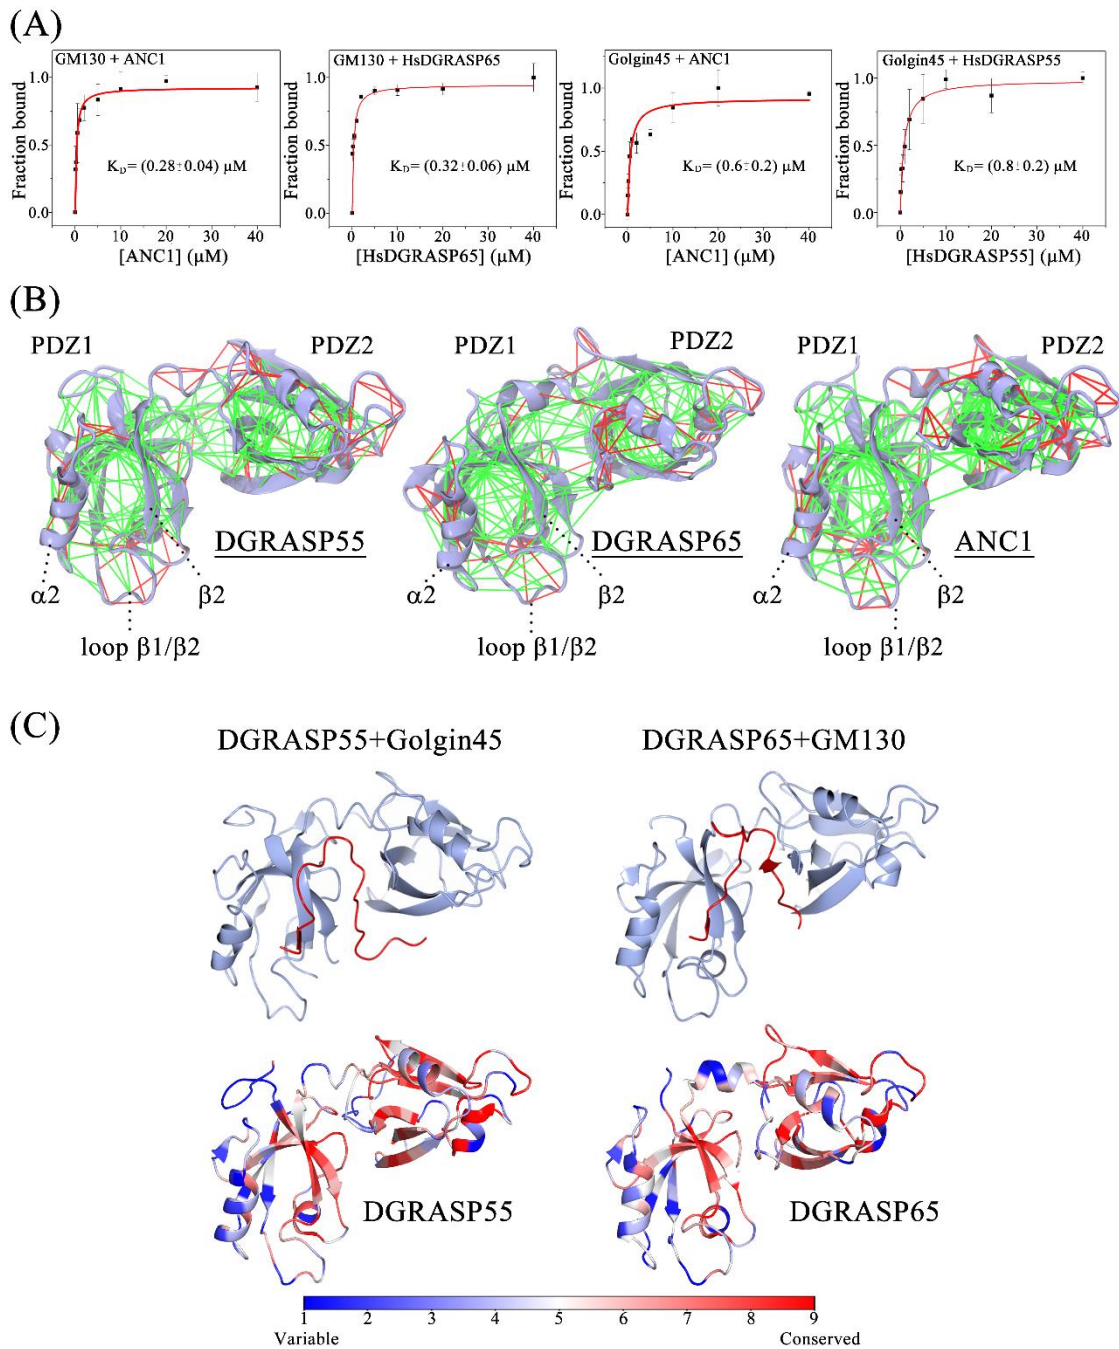

273 Figure 2: GRASP-Golgin specificity along with evolution and the history of the PDZ1 binding pocket. (A)  
 274 Binding isotherms of ANC1, DGRASP55, DGRASP65 with the Abz-labelled human GM130 and Golgin45  
 275 C-terminus region. A “One binding site” model was fitted to the data using OriginPro 8.5 (OriginLab  
 276 Corporation). Error bars represent standard deviations of triplicate measurements. (B) Configurational  
 277 frustration patterns of DGRASP55, DGRASP65, and ANC1 were calculated using Frustratometer [47]. The  
 278 colour scale indicates the local mutational frustration where the minimally (green) and highly frustrated  
 279 (red) sites are shown. (C) Ribbon representation (in light blue) of mammalian DGRASP55 and DGRASP65  
 280 bound to the C-terminal region of Golgin45 and GM130 (red), respectively (PDB IDs 5H3J and 4REY).  
 281 The structures were constructed using CCP4MG. The structure-mapped sequence conservation of both  
 282 GRASPs is also presented. Surface representations of both GRASP55 and GRASP65 were coloured  
 283 according to the degree of evolutionary conservation based on a dataset of 300 homologs collected from  
 284 Uniprot for each protein (identity between homologs varying from 30 to 95%) using ConSurf [48]. Blue  
 285 indicates high sequence variability, and red indicates high sequence conservation.

286

287 *Evolution made GRASPs less thermal/chemical/pH resistant*

288 We further explored the ancestor structures by monitoring their overall stability in some  
 289 physiologically relevant conditions. Firstly, the thermodynamic profiles of protein unfolding were  
 290 studied using differential scanning calorimetry (DSC). The ancestors showed greater thermal  
 291 stability and a tendency of increasing such stability over time regression (Figure 3A). DGRASP65  
 292 had the lowest  $T_M$  value and the broadest unfolding transition, reflecting its lowest structural  
 293 stability and the low cooperativity of unfolding. The low cooperativity of the thermal transition  
 294 comes from the lower number of tertiary contacts in the DGRASP65 structure, a property already  
 295 discussed elsewhere [17]. DGRASP55 was more thermally stable than DGRASP65 with a thermal  
 296 transition at 47°C, which was still considerably lower than ANC1 ( $T_M \sim 62^\circ\text{C}$ ), ANC2 ( $T_M \sim 73^\circ\text{C}$ ),  
 297 ANC3 ( $T_M \sim 74^\circ\text{C}$ ) and ANC4 ( $T_M \sim 77^\circ\text{C}$ ). Interestingly, we found a linear dependence when the  
 298 apparent  $T_M$  for each ancestor was plotted as a function of the estimated time when the ancestor  
 299 organism lived (Figure 3B).

300

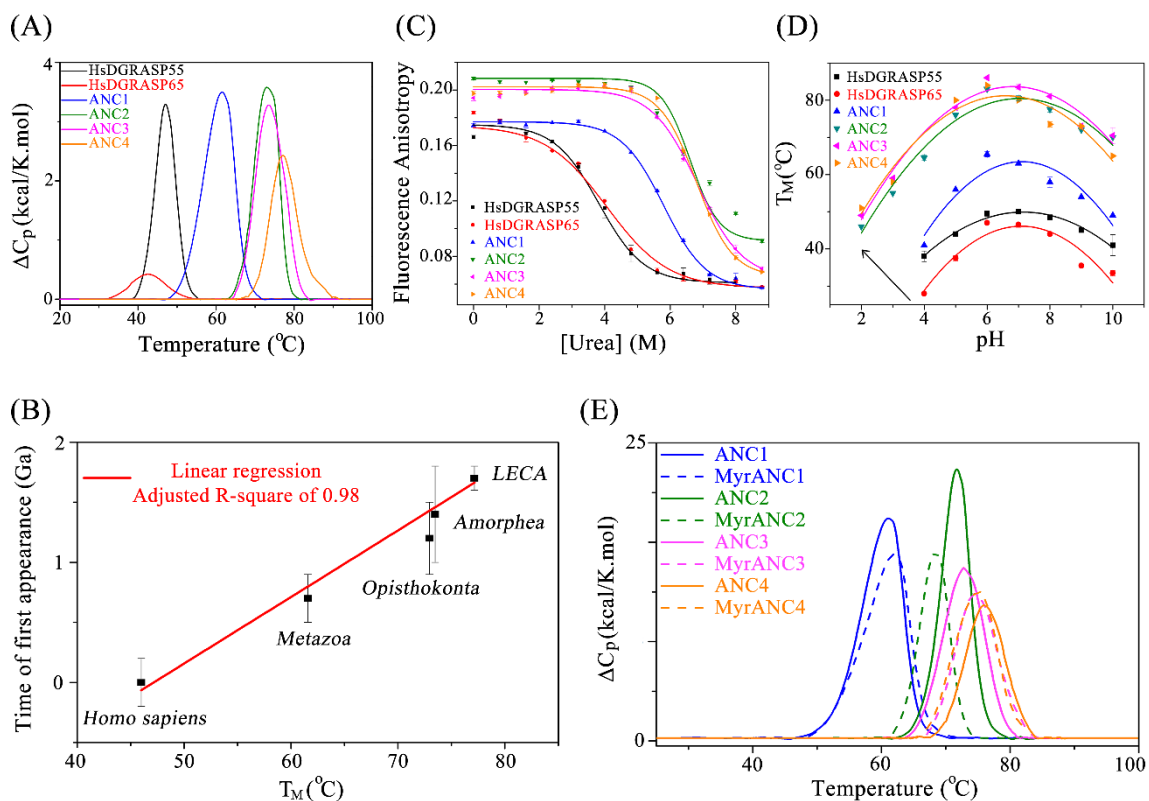

301

302 Figure 3: Thermodynamic analyses of the ancestor proteins compared with the modern human orthologues.  
 303 (A) Excess heat capacity of the modern and ancestor proteins at a fixed protein concentration. (B) The  
 304 experimental  $T_M$  values obtained in the DSC curves are plotted against the theoretical time of the first  
 305 appearance estimated from the evolution point where the ancestors were expected to be present, including  
 306 the variances. The references for the estimated time of first appearances are given in: Homo sapiens [49],  
 307 Metazoa [50], Opisthokonta [37], Amorphea [37], and LECA [51]. Error bars were taken as the uncertainty in  
 308 the estimated times of the first appearance given in the references and should not be considered as well-  
 309 established values. (C) Chemical denaturation using the chaotropic agent urea as monitored by fluorescence  
 310 anisotropy. Lines are fits of the Boltzmann equation to the experimental data. (D) Dependence of the  $T_M$

311 values as a function of the solution pH monitored by the fluorescence changes of the extrinsic probe SYPRO  
312 Orange using Differential Scanning Fluorimetry. Lines are fits of a second-degree polynomial function to  
313 the experimental data. (E) Excess heat capacity of the ancestor proteins and their myristoylated version at  
314 a fixed protein concentration and in the presence of detergent (0.03% DDM). Error bars represent standard  
315 deviations of duplicate (D) and triplicate (C) measurements.

316

317 Chemical perturbations, monitored by fluorescence anisotropy, and pH variations,  
318 monitored by Differential Scanning Fluorimetry (DSF), showed the same increase in structural  
319 stability for the ancestors (Figures 3C and D). In the chemical perturbation, since the tryptophan  
320 residues are conserved (Figure 1B), the fluorescence anisotropy values in the native condition are  
321 good indicators of structural flexibility in those regions. Hence, the higher values of anisotropy  
322 observed in the absence of urea indicate an increase in the ancestral proteins' structural rigidity  
323 compared to the human orthologs.

324

325 *Mammalian GRASPs are myristoylated in vivo, and so are their ancestors*

326 Prediction of N-terminal myristoylation, a well-established post-translational  
327 modification in mammalian GRASP, by neural networks using Myristoylator [<sup>52</sup>] showed that the  
328 four GRASP ancestors have a medium-to-high propensity of being myristoylated *in vivo* (Table  
329 S1). To confirm that the ancestors could indeed be myristoylated, we used a strategy based on the  
330 *in vitro* myristoylation of the protein's N-terminus performed by an N-Myristoyl transferase  
331 [<sup>53,54</sup>]. The first indirect observation of the success of the myristoylation strategy was the  
332 significant decrease in the protein solubility, likely due to the hydrophobic tail located in its N-  
333 terminus. Purification of myristoylated proteins required the presence of 0.03% DDM. The same  
334 buffer solution was used to purify the non-myristoylated versions for comparison (see Materials  
335 and Methods).

336 Our circular dichroism (CD) data indicated that the myristoylated tail did not disturb the  
337 secondary structure content (Figure S7). However, it did affect the protein stability for all the  
338 cases tested (Figure 3E). Nevertheless, the effect did not follow a regular pattern of alterations in  
339 parameters such as  $T_M$  or the calorimetric enthalpy variation, with increases and decreases  
340 observed that were not dependent on the time in evolution (Table S2). The only pattern followed  
341 by nearly all the proteins after myristoylation seemed to be the decrease in the cooperativity of  
342 the unfolding transition as estimated by the  $\Delta T_{1/2}$  (Table S2). Our data strongly support the  
343 hypothesis that, akin to the human paralogues, all the ANC proteins could be myristoylated *in*  
344 *vivo*. Such protein modification is likely an old trend in the GRASP family.

345

346 *Amyloid-like aggregation tendency and GRASPs as stress sensors*

347           The increase in structural flexibility and the decrease in protein stability observed in the  
348 modern orthologues could allow GRASPs to undergo conformational changes with an impact on  
349 cell function. For instance, human GRASPs and the GRASP orthologue in *S. cerevisiae* have been  
350 observed to form amyloid-like aggregates [55,4,36]. Other reports have shown that several Golgin  
351 proteins undergo liquid-liquid phase separation (LLPS), including GM130, golgin160,  
352 GMAP210, and 31, golgin97, golgin245, GCC88, and GCC185 [34,35]. Based on the apparent  
353 tendency of higher-order structure formation in some of the Opisthokonta family of Golgi-matrix  
354 proteins and the close relation between LLPS and protein fibrillation [56-60], we next addressed  
355 how old this fibrillation tendency would be in the GRASP family.

356           In that context, we expected that, should higher-order structure formation be necessary  
357 for a particular GRASP functionality during normal or cell-stress conditions, it must have always  
358 happened along with the evolution. Since fibrillation and any other type of self-association are a  
359 concentration-dependent phenomenon, we decided to study the ancestor's thermal denaturation  
360 as a function of the protein concentration. The unfolding transition curves should be  
361 concentration-independent unless oligomerization or aggregation processes take place. The DSC  
362 traces for the ANCs at low concentration (1 mg/mL) were monomodal and typical of a two-state  
363 transition (Figure 4). The DSC curves shifted toward higher temperatures (increase in apparent  
364  $T_M$ ) and became bimodal (Figure 4) upon concentration increase. In this bimodal DSC trace, the  
365 peak centred at the higher  $T_M$  seemed to become dominant as protein concentration raised. In the  
366 case of ANC1, the transition at the highest concentration presented a single endothermic peak  
367 (Figure 4). A similar tendency was also observed for the ANC 2, 3, and 4 with their DSC traces  
368 becoming gradually monomodal but without reaching a single peak stage. A single transition  
369 would likely be present in these cases should a higher concentration be used, which was not  
370 possible due to solubility issues.

371

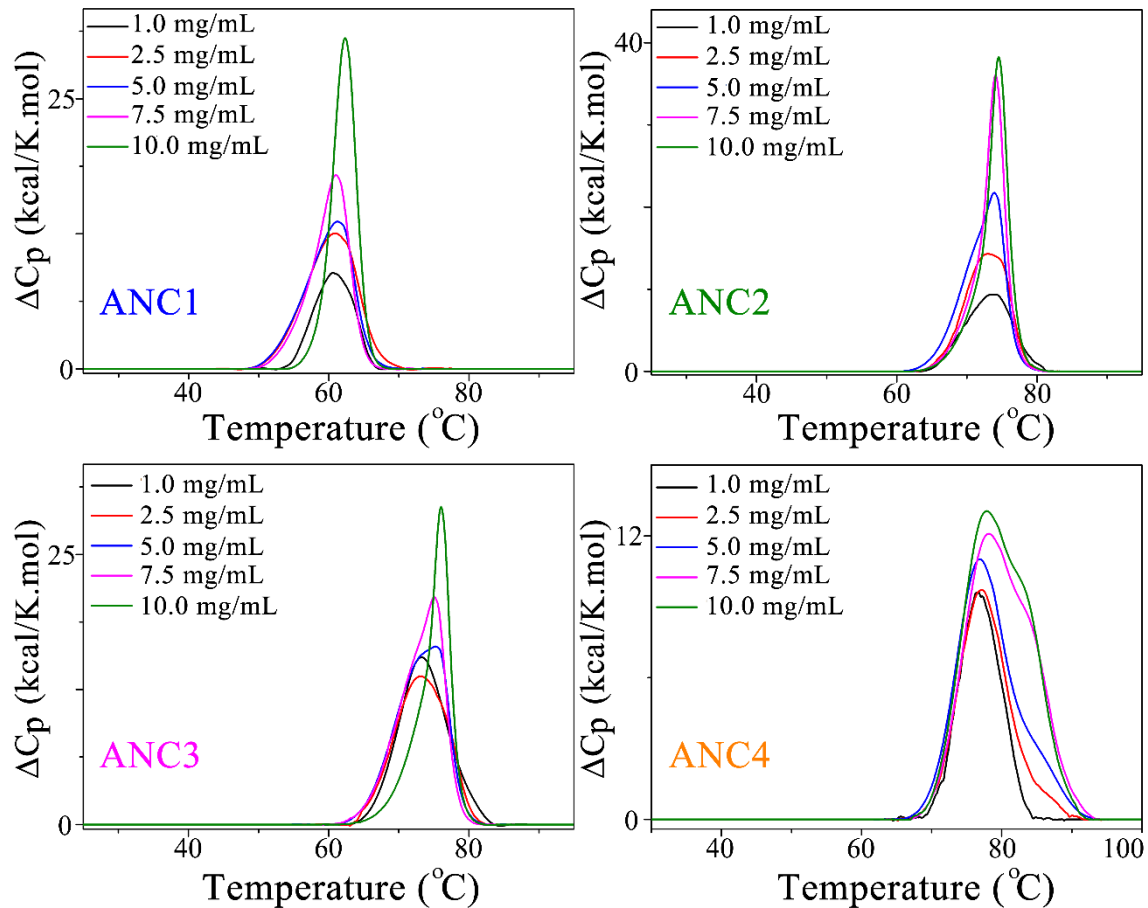

372

373 Figure 4. Excess heat capacity of the ancestor proteins using different protein concentrations (1.0, 2.5, 5.0,  
374 7.5, and 10.0 mg/mL) in buffer A. The raw DSC traces were subtracted with the buffer baseline and then  
375 normalized by protein concentration.

376

377 Our data indicated the existence of a concentration-dependent self-association process,  
378 which increased the ancestors' thermal stability. Given that aggregation is a concentration-  
379 dependent process and that some GRASP representatives can form amyloid fibres, the samples  
380 from the DSC run at the highest concentration were tested for the typical autofluorescence of  
381 amyloid fibres (Figure 5A) [61]. Just like observed for Aβ40, K18 tau, γ-B-crystallin, HEWL, and  
382 I59T lysozyme [62,63], all the ancestor proteins showed the classical intrinsic fluorescence in the  
383 visible range that is a signature of amyloid formation (Figure 5A-B). The ancestor's fibres also  
384 showed the classical increase in affinity for the amyloid-detector dye ThT (Figure 5C).  
385 Collectively, our data support the conclusion that, just like the modern orthologues in *Homo*  
386 *sapiens* and yeast, GRASPs have an amyloid-like formation propensity that comes from LECA  
387 and that is concentration- and temperature-dependent.

388

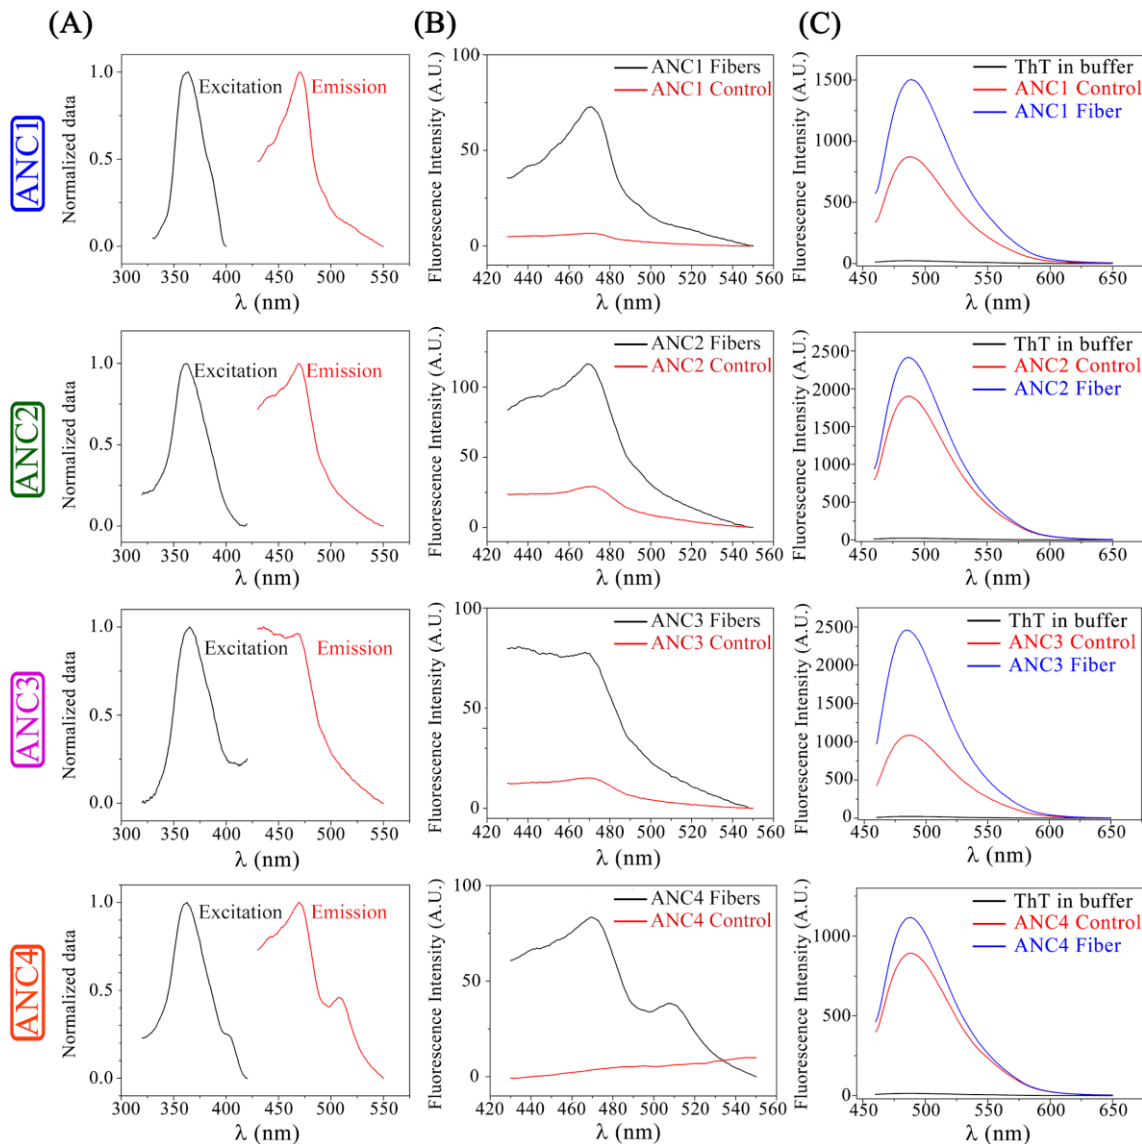

389

390 Figure 5: Spectroscopic properties of the thermally induced aggregation observed for each ancestor protein  
 391 after the DSC experiments. The ancestors were tested for the excitation/emission peaks characteristic of the  
 392 amyloid fibres (column 1). The emission spectra using the excitation fixed at 365 nm were collected for the  
 393 proteins before and after the thermal treatment (column 2). The thermally treated samples were also tested  
 394 for the increase in affinity for ThT (column 3) compared with the protein solution before the thermal  
 395 treatment and for the ThT fluorescence in the absence of protein in the buffer solution.

396

397 To show that only a mild denaturation condition was necessary for the fibrillation process  
 398 to happen, the kinetics of the fibrillation process was monitored measuring the intensity of the  
 399 autofluorescence from the amyloid fibres (Figure 6). Using a temperature value high enough to  
 400 increase the rate of amyloid formation but still significantly below the ancestor  $T_M$  values (Figure  
 401 4A), we showed that all the ancestors had a nucleation-dependent fibrillation curve that was  
 402 completely absent in the control sample kept at room temperature (Figure 6). The ANC1 was the  
 403 ancestor with the slowest kinetics, taking a lag time of more than one day before reaching full  
 404 saturation. The ANC2, on the other hand, was the fastest, reaching a saturation profile in a couple

405 of minutes (Figure 6). It is not clear the reasons for this significant difference in the fibrillation  
406 kinetics. However, the time interval for the ANC2 fibrillation agrees with what was previously  
407 observed for the *S. cerevisiae* GRASP [4]. Since the ANC2 is predicted to be the ancestor of the  
408 Metazoans with the Fungi kingdom, it seems that the faster fibrillation tendency was maintained  
409 in the Fungi examples but strongly decreased in the Metazoans. In agreement with this  
410 observation, it has been shown that the saturation of the curves for the human GRASPs needed a  
411 couple of days to occur [36]. ANC3 and ANC4 had comparable kinetics, although ANC4  
412 fibrillated faster and in a more cooperative manner. Our data suggest that GRASPs have always  
413 been fibrillation-prone proteins, and the increase of this aggregation tendency is somehow  
414 controlled depending on the branch of the eukaryotic tree.  
415

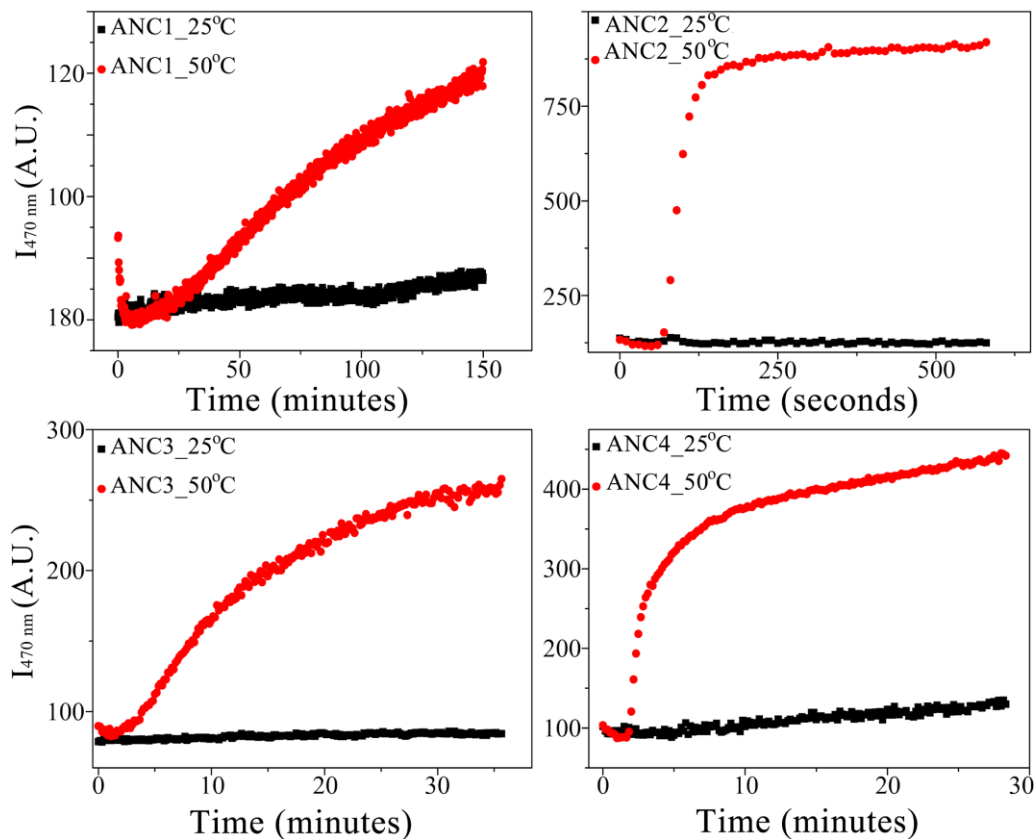

416

417 Figure 6: Fibrillation kinetics of the ancestor proteins monitored by the fibre autofluorescence intensity at  
418 470 nm as a function of time. It is worth noting that 50°C is considerably lower than the ancestor's  $T_M$   
419 values (Figure 4A).

420

421 To further explore other conditions involved in triggering self-association under thermal  
422 stress besides concentration, we fixed the protein concentration and varied the ionic strength of  
423 the solution. Figure S8 shows the DSC traces, and once more, the curves became bimodal as the  
424 salt concentration was raised. To show that the higher salt concentration was not inducing self-



425 association without the structural perturbation caused by the temperature, room-temperature SEC-  
426 MALS experiments at high ionic strength were performed (Figure S9). The data clearly showed  
427 that all the ANCs, akin to the human paralogues, kept the monomeric organization at room  
428 temperature. The higher ionic strength had no effect without the increase in temperature (Figure  
429 S9). Therefore, the ancestor's aggregation process, just like it was observed before for the human  
430 and fungi GRASPs [4,36,55], is indeed stress-induced (thermal stress in the situation tested here)  
431 and controlled by the protein concentration and the ionic strength of the solution.

432 To shed light on why an external perturbation is necessary for self-association, an  
433 aggregation analysis was performed using the CamSol method [64,65]. The method relies on two  
434 different analyses: one based solely on the primary protein sequence and a structure-based method  
435 of calculating a solubility profile, which accounts for the proximity of the amino acids in the 3D  
436 structure and their solvent exposure [65]. It is important to note several hotspots for protein  
437 aggregation when only the amino acid sequence is analyzed (intrinsic analyses), seen in all the  
438 ancestor proteins (Figure 7). However, several of those hotspots of aggregation vanished when  
439 CamSol considered the protein tertiary structure (Figure 7). Therefore, a perturbation of the  
440 protein structure is pivotal to exposing the sites for aggregation and inducing the fibrillation  
441 process, which was achieved in the DSC/fluorescence experiments by increasing the temperature  
442 (Figures 5 and 6). In this sense, it was previously observed that the GRASP orthologue in *S.*  
443 *cerevisiae* formed amyloid fibres only at a temperature close to its  $T_M$  or in acidic solutions [4].  
444 The activation of GRASP fibrillation could be related to a protective mechanism in non-  
445 permissive temperatures. The same profile was also observed *in vivo* during nutrient starvation,  
446 suggesting remarkable plasticity of function for these aggregates [31]. It is worth pointing that the  
447 human GRASPs contain more aggregation hotspots in their GRASP domain compared with the  
448 SPR [36,55]. The GRASP in *S. cerevisiae* was also shown to fibrillate even in the absence of the  
449 SPR region [4]. Therefore, it seems that the GRASP domain drives GRASP fibrillation in modern  
450 systems as well as in their ancestor's counterparts.

451

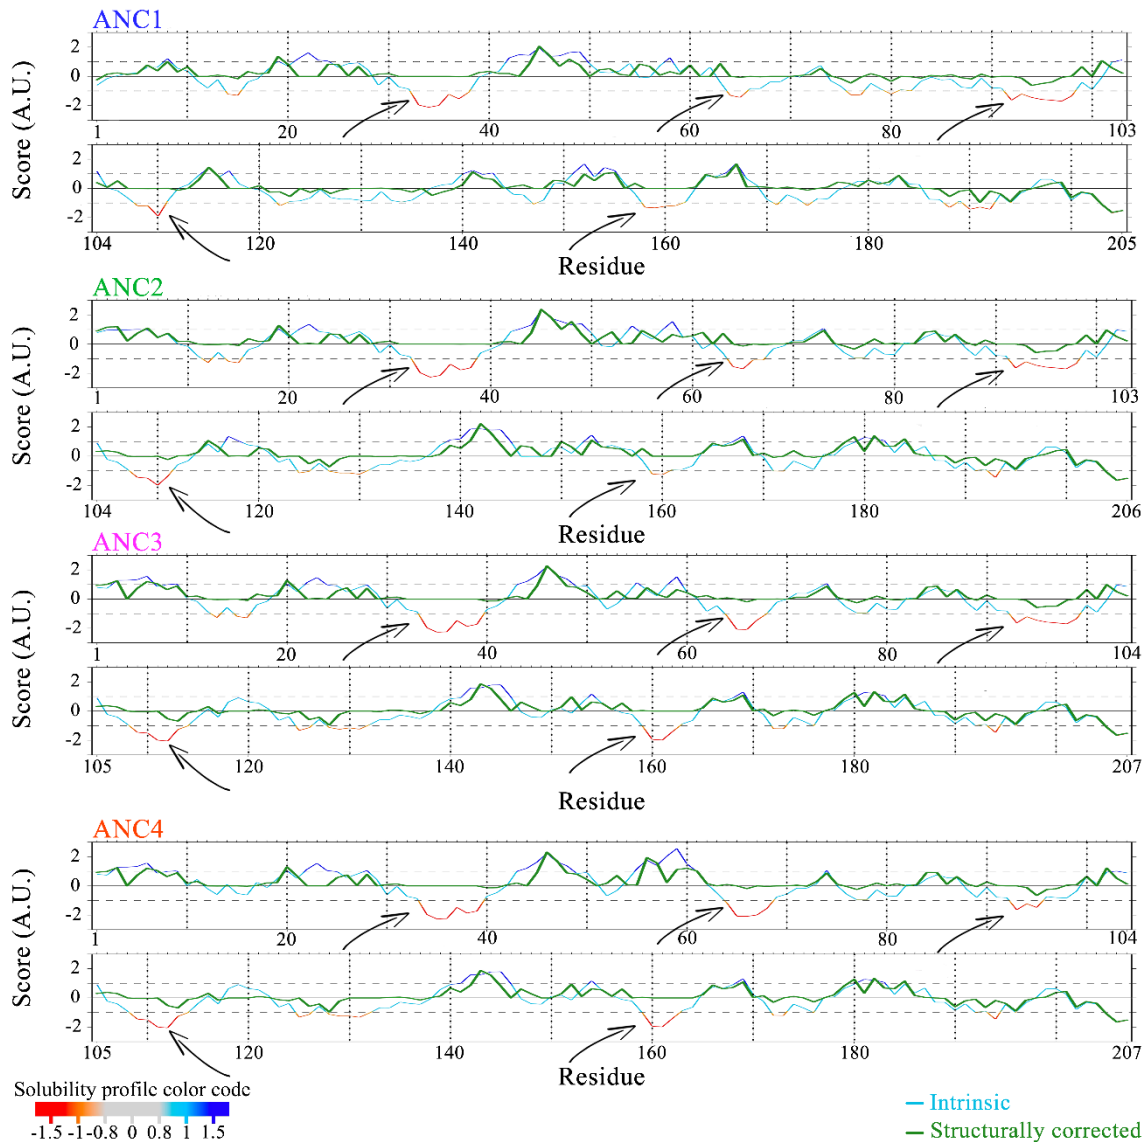

452

453 Figure 7: CamSol analyses of the ancestor sequences based on the intrinsic prediction from the primary  
454 sequence and the structurally corrected prediction using the predicted structure from molecular modelling.  
455 The (structurally corrected) solubility score from  $-1.5$  to  $1.5$  is mapped on the protein's amino acid  
456 sequences and represented in a colour gradient from red (low solubility) to blue (high solubility). The  
457 arrows indicate the regions with the lowest solubility scores.

458

## 459 Discussion

460 GRASPs form a family of malleable proteins with unique structural properties  
461 [11,12,14,17,25,26], several different functionalities [11,15] and a promiscuous interactome [25]. Despite  
462 being central hubs in the cell interactome, the detailed description of their roles in those different  
463 processes still deserves more attention. The number of genes codifying GRASP among organisms  
464 can vary. Plants do not have any obvious GRASP/GM130/Golgin45 homologues but have stacked  
465 Golgi [18]. Fungi, on the other hand, have one GRASP homolog, which anchors a GM130-like  
466 protein called Bug1 (not a GM130 homolog), and their Golgi varies from stacked to fully

467 dispersed in the cytosol [26]. Mammals have two GRASPs located in different positions in their  
468 stacked Golgi. A better understanding of how GRASP structural properties have evolved can  
469 certainly impact the description of the diverse set of cell processes involving that Golgi matrix  
470 protein. Among those processes, the Golgi structure organization, the out-of-normal conditions  
471 observed in cell response to stress (particularly those that trigger UPS), and the many Golgi  
472 perturbations observed in diseases and apoptosis are of special interest [30,66,67].

473 A first attempt to correlate the biophysical properties of GRASPs from different  
474 organisms showed that GRASP65 was more like GRASPs from lower eukaryotes [17]. Here, we  
475 used modern computational and molecular biology methods to turn on the time machine in protein  
476 evolution, therefore making it possible to follow aspects of the protein's biochemical and  
477 biophysical properties over time. We showed that going backward in time, GRASPs were more  
478 rigid, thermally and chemically stable, and tolerant to pH variations (Figure 8A). Evolution seems  
479 to have pressed GRASP to be more flexible by increasing the extension of its IDRs and decreasing  
480 its overall tertiary structural stability, flexibility, and compaction (Figure 9A). Therefore, it is  
481 curious to note that, upon the appearance of the Metazoa paralogy GRASP55/GRASP65 in  
482 evolution, the tendency of higher flexibility was kept mainly by GRASP65. This indicates that  
483 GRASP55 is suffering from a unique evolutionary pressure and is probably involved in Metazoa-  
484 specific functionalities. It has been observed that GRASP55 is more involved in UPS [13,68],  
485 energy sensing in the Golgi [69], and membrane tethering in autophagy under cell stress [70].  
486 GRASP65 participates in Golgi dynamics, especially in processes such as Golgi organization  
487 [71,72], Golgi fragmentation in apoptosis [73], and modulation of Golgi structure and microtubule  
488 organization during cell division [74,75]. Therefore, it is likely that GRASP65's higher flexibility  
489 and similarity with lower eukaryotes [17] are determinants of its participation in Golgi dynamics.  
490 On the other hand, participation in UPS seems to require a more "ordered" and less malleable  
491 structure as GRASP55.

492 Regarding their domain constituents, the GRASP domain (DGRASP) has been under the  
493 spotlight much more frequently than the disordered and highly variable SPR domain. Within  
494 DGRASP, the once believed as fully ordered PDZ sub-domains have also shown different  
495 biophysical properties [17]. The further dissection of the PDZ's biophysical properties showed  
496 that, despite the PDZ1 variability, the glycine in position 2 was fully conserved in the ancestor's  
497 sequences (Figure 1B). We demonstrated that, in the presence of a broad-spectrum N-  
498 myristoyltransferase and the myristate substrate, all the ANCs were successfully N-myristoylated  
499 in our *in vivo* model, suggesting that, given the proper conditions, they could also suffer such  
500 modification in their native extinct organisms. Myristoylation is an old protein modification that  
501 plays several different roles in eukaryotic systems. The binding to the membrane directly relates  
502 to GRASP functionalities, including its oligomerization tendency and Golgi organization [11].

503 Therefore, we expect that the GRASP ancestors were already associated with the Golgi complex  
 504 membranes in the past (Figure 8B).

505

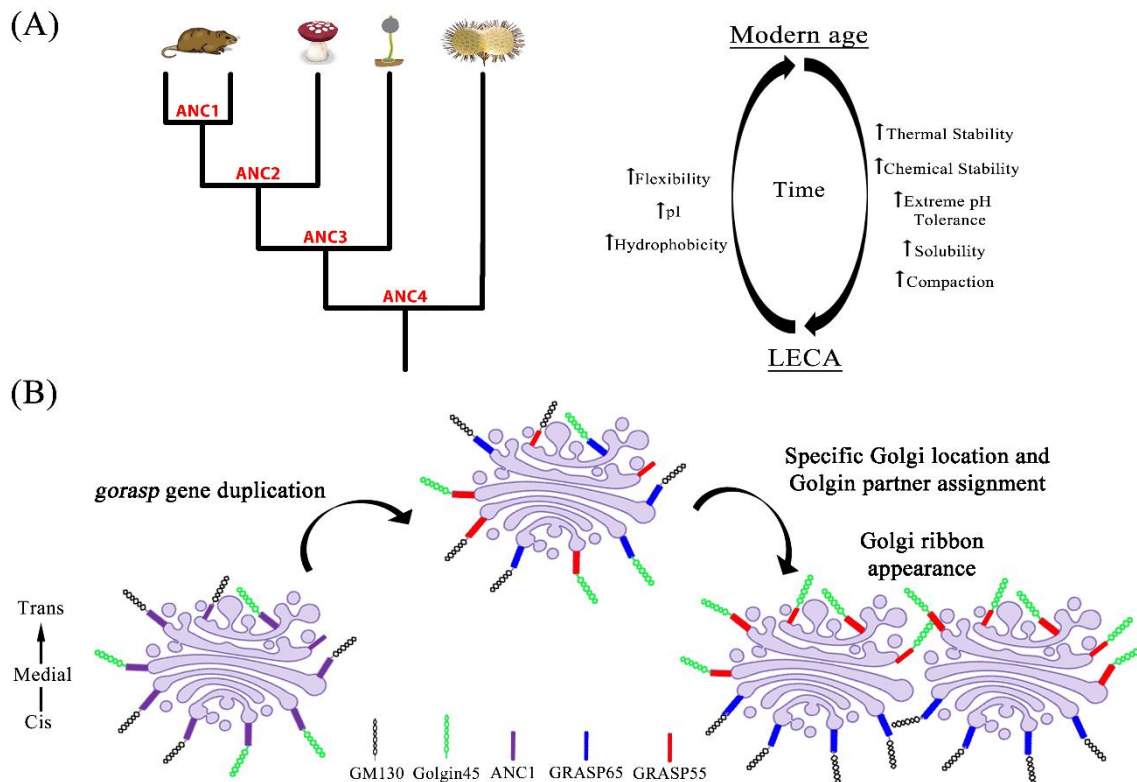

506

507 Figure 8: Lessons about GRASP coming from their ancestors. (A) Biophysical properties that GRASPs  
 508 acquired during evolution and those significantly altered. (B) A model for the origin of the Golgi ribbon  
 509 in vertebrates. At first, before the appearance of Golgin45 and GM130 in holozoans, the ancient Golgi was  
 510 equally populated by a GRASP homolog here represented as the ANC1. Right after the appearance of  
 511 Golgin45 and GM130, our data suggest that the ancestor GRASP could anchor both Golgins with high  
 512 affinity. After the *gorasp* gene duplication, both proteins started to diverge so that they differentiate in  
 513 Golgi location and golgin partners: GRASP65 with GM130 in the *cis*-Golgi, and GRASP55 binds Golgin45  
 514 in the *trans/medial* faces. Since the coordinated action of these four proteins is necessary for the Golgi  
 515 ribbon formation, that would be the birth of the Golgi ribbon.

516

517 Interestingly, we showed here that ANC1, the common ancestor of GRASP55 and  
 518 GRASP65, interacted with both GM130 and Golgin45 with high affinity (Figure 2A). It is worth  
 519 noting that our estimated time for ANC1 existence roughly coincides with the appearance of  
 520 Golgin45 and GM130. Therefore, when Golgin45 and GM130 appeared in evolution, an ancestor  
 521 GRASP (ANC1) capable of recruiting both Golgins was already bound to the Golgi complex,  
 522 probably without any preferential Golgi location (Figure 8B). When the *gorasp* gene duplication  
 523 (GRASP65- Chromosome 3 and GRASP55- Chromosome 2) occurred, there was no reason for  
 524 any preferential binding between these new GRASPs and the Golgins (Figure 8B). Hence, the  
 525 specific assignment of the GRASP binding partners and their location in the Golgi came after an

526 evolutionary pressure, yielding the pair GRASP65/GM130 in the *cis*-Golgi, and the  
527 GRASP55/Golgin45 in the *trans/medial* faces. In both cases, the pairs of proteins were  
528 particularly close to the rims of the Golgi stacks [23] (Figure 8B). This is directly reflected in the  
529 degree of sequence variability observed inside the binding pocket of PDZ1 and in the overall  
530 degree of frustration on the cleft between PDZ1 and PDZ2 (Figure 2). Since the coordinated  
531 action of these four proteins is necessary for the Golgi ribbon formation [22,23], this might have  
532 been the birth of the Golgi ribbon (Figure 8B).

533 Another intriguing feature of modern GRASPs is their capacity to form higher-order  
534 structures under stress [4,36]. Other Golgi-related proteins, including GM130, have shown  
535 involvement in forming exquisite compartments via LLPS [34,35]. The intimate relationship  
536 between those two processes led us to explore the fibrillation phenotype along with evolution.  
537 Our data indicate that GRASP has always been a stress sensor capable of adjusting itself to  
538 mediate protein-protein interactions (PPIs) and form complex structures, like amyloid-like fibrils.  
539 It is impacting to notice how most of those features were preserved along with evolution and how  
540 they could have naturally driven GRASPs to perform several of their different cell functionalities.

541 We then propose that GRASPs could act in two different cell scenarios. In scenario 1,  
542 when native conditions were present, GRASPs would work as tethering factors capable of  
543 mediating several different PPIs essential for the correct flow of the exocytic pathway. They  
544 would also participate in the formation of the higher-order architecture of the Golgi in synergy  
545 with the Golgins [14,22,23]. The latter property might have been the natural cause of GRASP  
546 duplication since GRASP65 is responsible for retaining GM130 and p115 into the *cis*-Golgi. At  
547 the same time, GRASP55 in the *trans/medial* Golgi faces is responsible for the retention of  
548 Golgin45 [22]. The need for two GRASPs in Metazoans is also justified by the unique participation  
549 of these proteins in the Golgi ribbon formation (a vertebrate-specific structural organization [76])  
550 and as a negative regulator of exocytic transport, necessary for correct protein-cargo glycosylation  
551 [77]. In scenario 2, under stress, GRASPs could form higher-order structures with a potential cell-  
552 protective functionality and with direct involvement in UPS. Stress conditions were shown to  
553 induce GRASP phosphorylation [2,68] and O-GlcNAcylation [78], then breaking its  
554 oligomerization properties and also its retention in the Golgi membranes. Therefore, GRASP  
555 could work as tethering factors in UPS and be involved in forming condensates or aggregated  
556 structures, recruiting specific proteins for UPS. GRASP fibrillation under stress, both chemically  
557 (starvation-triggered) and under heat, was already observed *in vivo* and shown to be reversible  
558 [31].

559 In conclusion, we demonstrated here that GRASP constitutes a family of myristoylated  
560 proteins with high structural plasticity that can respond to stress conditions by inducing a self-

561 association process, which might be relevant in UPS. Remarkably, their promiscuous interactome  
562 correlates with significant variability in the binding pocket of PDZ1 and an extensive array of  
563 conserved highly frustrated interactions in the surface of both PDZs. We showed that all these  
564 features are not restricted to the modern mammalian GRASP but seem to be already present in  
565 GRASPs back to LECA. More than that, these proteins adapted themselves to the many variations  
566 of Earth's temperature along with evolution without losing their structural plasticity. How this  
567 adaptation specifically impacts the plethora of functions performed by GRASPs remains to be  
568 unravelled. Several exciting themes are therefore still open for future studies involving this  
569 moonlighting family of Golgi-matrix proteins.

570

## 571 **Materials and Methods**

### 572 *Ancestor sequence reconstruction (ASR)*

573 To resurrect the GRASP ancestors, the sequences of the GRASP orthologues were  
574 manually collected using the primary sequence of human GRASP65 and GRASP55 as templates  
575 in the NCBI database. The GRASP domain for each orthologue was predicted using Pfam [79,80].  
576 An initial database was constructed comprising >100 DGRASP orthologues, and the first  
577 refinement was performed by sequence alignment using ClustalΩ [81]. The quality of the  
578 alignment is essential for the Ancestor Sequence Reconstruction (ASR). All the sequences with  
579 unique insertions/deletions were manually removed. A total of 83 DGRASP orthologues were  
580 used in the final analyses. The sequences were aligned with MUSCLE v3.8.31 [82] and MSAProbs  
581 0.9 [83]. Phylogeny was inferred using a maximum likelihood method implemented in RAxML  
582 [84]. These processes were interactively performed using Phylobot [85]. Phylobot searches for the  
583 tree and branch lengths with the highest probability of producing the sequence alignment based  
584 on a collection of Markov models of amino acid substitution [85]. Therefore, the software builds  
585 ML trees for all combinations of sequence alignments and evolutionary models in its collection.  
586 Ancestral protein sequences were reconstructed using the empirical Bayes approach as  
587 implemented in the software CODEML [86] controlled by Lazarus [87]. The final computational  
588 data can be found in <http://www.phylobot.com/portal/status/VnJfz/>. The ancestors with the  
589 highest probability estimated in the sequence alignment method and Markov model were  
590 synthesized by GeneScript with codon optimization for *E. coli* heterologous expression and  
591 subcloned into a pET28a (Novagene) vector using NcoI and XhoI restriction sites.

592

### 593 *Protein Expression and Purification*

594 The human DGRASP55 and DGRASP65 were expressed and purified as described  
595 elsewhere [17]. The protocol for the ancestor proteins production was the same as the one used for  
596 modern human proteins. The final purified protein solutions were 20 mM Tris/HCl, 150 mM  
597 NaCl, 5 mM 2-Mercaptoethanol, pH 8.0 (Buffer A). GRASP myristoylation was performed using  
598 an adapted protocol described in [53,54]. Due to the low solubility of the myristoylated protein, the  
599 working buffer for these proteins was 1X PBS + 150 mM NaCl, 5 mM 2-Mercaptoethanol, 0.03%  
600 DDM, pH 7.4. Comparisons between myristoylated and non-myristoylated proteins were always  
601 made with the proteins in the same working buffer.

602

### 603 *Fluorescence spectroscopy*

604 Steady-state fluorescence was monitored using a Hitachi F-7000 spectrofluorometer  
605 equipped with a 150 W xenon arc lamp and polarized filters for anisotropy experiments. The  
606 excitation and emission monochromators were set at 5 nm slit width. For tryptophan fluorescence  
607 anisotropy, the samples were selectively excited at 300 nm. The anisotropy values were calculated  
608 as the mean average of the values from  $\pm 10$  nm (1 nm step acquisition) over the wavelength of  
609 maximum emission determined for each condition. All experiments were performed at 25 °C. The  
610 anisotropy experiments were performed in triplicate.

611 The isotherms of binding between ANC1 and the human C-terminus mimicking peptides  
612 of GM130 (Abz-GSNPCIPFFYRADENDEVKITVI) and Golgin45 (Abz-  
613 HPYTRYENITFNCCNHCRGELIAL) were performed at a fixed temperature of 25°C. Peptides  
614 were chemically synthesized by Biomatik with a purity by HPLC of >95%. The experiments were  
615 performed by fixing the peptide amount at 1  $\mu$ M and varying the ANC1, DGRASP55, or  
616 DGRASP65 concentrations, with an overnight incubation time at 4°C without agitation.  
617 Fluorescence measurements were performed using an excitation of 350 nm, data collection from  
618 370 to 600 nm, and excitation/emission monochromators at 10 nm slit width. The experiments  
619 were done in triplicate.

620 Amyloid fibre autofluorescence measurements were performed using an excitation of 365  
621 nm and the spectra collected from 430-550 nm. The excitation and emission monochromators  
622 were set at 10 nm slit width. Excitation peaks were collected by monitoring the fluorescence  
623 intensity at 470 nm using the same parameters. In the Thioflavin (ThT) fluorescence, the  
624 fluorophore was kept at a concentration of 20  $\mu$ M in all the conditions tested. Details of the sample  
625 preparation for these experiments are described in the DSC section. All experiments were  
626 repeated at least twice.

627 For the fibrillation kinetic experiments, 5 mg/mL of protein solutions were inserted in the  
628 equipment previously equilibrated at 25°C or 50°C, and the fluorescence intensity at 470 nm  
629 (excitation at 365 nm) was collected over time using a 10-second step. A cuvette containing each  
630 ancestor protein was first tested at a temperature of 25°C (control sample). The same protein  
631 solution/cuvette was then removed, and the fluorimeter was warmed up to 50°C using a water  
632 bath. The sample was added to the machine, and the kinetic experiment was started immediately  
633 after. All experiments were repeated at least twice.

634

#### 635 *Differential scanning fluorimetry (DSF)*

636 Protein melting temperature ( $T_M$ ), assuming a two-state transition model, was determined  
637 by monitoring the fluorescence intensity variation as a function of temperature for the extrinsic  
638 probe SYPRO Orange (Invitrogen). The assays were performed in an Agilent Mx3005P qPCR  
639 System equipped with a FAM SYBr green I filter with excitation and emission wavelengths of  
640 492 nm and 516 nm, respectively. The thermal variations were in the range 25-95°C in a stepwise  
641 increment of 1 °C/minute step and using a 96-well PCR plate (Agilent Technologies) sealed with  
642 optical quality sealing tape (Microseal® 'B' seal from BIO-RAD). Data were analysed using the  
643 software Origin 8.5. The fluorescence intensity as a function of the temperature was individually  
644 analysed for the classical two state-transition shapes. The  $T_M$  was determined as the maximum  
645 intensity point of the first-order derivative curve. For the experimental setup, buffer solutions  
646 from pH 2 to 10 were prepared and filtered using a 0.2 µm filter paper: 50 mM of glycine/HCl  
647 (pH 2.0-3.0), 50 mM sodium acetate/acetic acid (pH 4.0), 50 mM sodium phosphate (pH 5.0–  
648 8.0), and 50 mM glycine NaOH (pH 9.0 and 10.0). Protein solutions were concentrated to 2  
649 mg/mL, and a dilution of 10 times was prepared in each buffer. All the DSF experiments were  
650 performed in duplicate.

651

#### 652 *Differential Scanning Calorimetry (DSC)*

653 The experiments were performed in a Nano-DSC II—Calorimetry Sciences Corporation,  
654 CSC (Lindon, Utah, USA). A heating rate of 1°C/minute was used to sweep from 25-100°C at a  
655 controlled pressure of 3 atm. The reversibility of all transitions was tested by collecting repeated  
656 heating scans. To explore the thermotropic effects caused by varying the protein concentrations,  
657 measurements were carried out in 20 mM Tris/HCl, 150 mM NaCl, 5 mM 2-Mercaptoethanol,  
658 pH 8.0 with protein concentration ranging from 1-10 mg/mL. To explore the effects of the ionic  
659 strength on the thermotropic behaviour of the ancestors, a fixed protein concentration of 2.5  
660 mg/mL was used in a 20 mM Tris/HCl, 5 mM 2-Mercaptoethanol, pH 8.0 with the NaCl



661 concentrations of 0 (< 1 mM by dialyses using a 10 kDa cutoff centrifugal filter unit from  
662 Millipore, Burlington, MA, USA), 150, 300, 450 and 600 mM. Samples were degassed by  
663 centrifugation (16.000xg per 2 minutes) before use. All experiments were done in duplicate.

664 For the detection of thermally induced amyloid formation presented in Figure 5, the 10  
665 mg/mL protein solution used in the previous DSC experiments was used. The DSC-treated  
666 solution was first diluted two times in Buffer A and sonicated in ice for 30 seconds (5- and 25-  
667 seconds pulse on and off, respectively) using an amplitude of 10% in a BRANSON Digital  
668 Sonifire® (Soni-tech). Protein concentration was kept fixed at approximately 5 mg/mL in Buffer  
669 A.

670

#### 671 *Size Exclusion Chromatography with Multi-Angle Light Scattering (SEC-MALS)*

672 SEC-MALS measurements were performed on a miniDAWN TREOS multi-angle light  
673 scattering equipment with detectors at three angles (43.6°, 90°, and 136.4°) and a 659 nm laser  
674 beam (Wyatt Technology, CA). A Wyatt QELS dynamic light scattering module for determining  
675 hydrodynamic radius and an Optilab® rEX refractometer (Wyatt Technology) were used in line  
676 with a size exclusion chromatography analytical column (Superdex 200 HR10/300, GE  
677 Healthcare). BSA was used as a control sample. The protein solutions were eluted in a 50 mM  
678 Tris HCl, 500 mM NaCl buffer, pH 8.0, with a flow rate of 0.5 mL/min. The data were processed  
679 using ASTRA7 software (Wyatt Technology) with the following parameters: refractive index of  
680 1.331, 0.890 cP for the viscosity of the solvent, and a dn/dc (refractive index increment) as 0.1850  
681 mL/g (a common value for proteins). Protein solutions were centrifuged for 10 minutes at  
682 10.000xg at a controlled temperature of 4°C before use.

683

#### 684 *Circular Dichroism (CD)*

685 Far-UV (195-260 nm) CD experiments were performed in a Jasco J-815 CD Spectrometer  
686 (JASCO Corporation, Easton, MD, USA) equipped with a Peltier temperature control and using  
687 a quartz cell with a 1-mm path length. The spectra were recorded with a scanning speed of 100  
688 nm.min<sup>-1</sup>, spectral bandwidth of 1 nm, a response time of 0.5 s. The standard error presented were  
689 calculated from a triplicate sample measurement. All the protein stock solutions were at a  
690 minimum concentration where the dilution in a 20 mM sodium phosphate pH 8.0 + 0.03% DDM  
691 was at least 20-fold. All the experiments were performed at 25 °C.

692

#### 693 *Bioinformatics*

694 Protein intrinsic disorder predictions were performed using the PONDR VXL,  
695 CAN\_XT, and VS2L software (<http://www.pondr.com/> accessed in 2020). The grand average of  
696 hydrophathy (GRAVY) value for each modern and ancestor protein was calculated using  
697 ProtParam (<https://web.expasy.org/protparam/> accessed in 2019) [39].

698 Coevolution and conservation analyses were performed using CONAN [88]. The analysis  
699 was performed over the Pfam [80] domain GRASP55\_65 (PF04495), filtered by removing  
700 sequences not presenting at least 80% of the expected positions in its HMM and removing  
701 redundancy (80% identity). Coevolution signals were considered for residue-position pairs  
702 present in at least 5% of the sequences in the alignment with a minimum  $-\log(p\text{-value})$  of 10. The  
703 statistical validation method was based on Tumminello *et al.* [89], and the calculation was  
704 expanded to include marginally conserved residues.

705 Frustratometer 2 (<http://frustratometer.qb.fcen.uba.ar/> accessed in 2020) [47] was used  
706 to localize the level of frustration for each residue interaction [47]. The structural models of  
707 DGRASP55 (PDB ID 4KFW) and DGRASP65 (PDB ID 4KFV) were used in the analyses. For  
708 the ancestors, the molecular models of ANC1, 2, 3, and 4 were calculated by threading using  
709 AlphaFold2 [90], I-TASSER [91] and Swiss-model [92] (with GRASP55 - PDB IDs 4KFW as  
710 template).

711 The ConSurf Server was used to estimate the degree of evolutionary conservation in both  
712 mammalian DGRASP55 and DGRASP65 (PDB IDs 4KFW and 4KFV) [48]. The Homologues  
713 were collected from UniProt using HMMER, and Multiple Sequence Alignment was built using  
714 CLUSTALW. It was collected 300 homologues for each protein using a percentage of identity in  
715 the range of 30-95%.

716

## 717 **Acknowledgments**

718 The authors thank the Fundação de Amparo à Pesquisa do Estado de São Paulo (FAPESP)  
719 (Grants No. 2015/50366-7 and 2012/20367-3), Conselho Nacional de Desenvolvimento  
720 Científico e Tecnológico (CNPq) (Grant no. 306682/2018-4), and Coordenação de  
721 Aperfeiçoamento de Pessoal de Nível Superior (CAPES) for the financial support. LFSM and  
722 MRBB thank FAPESP for the postdoctoral grants No. 2017/24669- 8 and No. 2016/16328-3,  
723 respectively. MCM thanks FAPESP for the Ph.D. scholarship grant No. 2017/24669- 8. EK  
724 thanks CAPES for the scholarship (88882.378790/2019-01). The authors also thank the  
725 Molecular Biophysics Group at Sao Carlos Physics Institute of the University of Sao Paulo for  
726 allowing access to the SEC-MALS (FAPESP Grant number: 15/16812-0).

727

728 **Conflict of interest**

729 The authors declare that they have no conflict of interest.

730

731 **Supplementary Material:**

732 - Figures S1 to S9

733 - Table S1 and S2

734

735

736

737

738

739

740

741

742

743

744

745

746

747

748

749

750

751

752

753

## 754 **References**

755 -----

- 756 1. Palade, G. Intracellular aspects of process of protein-synthesis. *Science* **189**, 347-358  
757 (1975).
- 758 2. Rabouille, C. Pathways of Unconventional Protein Secretion. *Trends in Cell Biology* **27**,  
759 230-240 (2017).
- 760 3. Kinseth, M.A. et al. The golgi-associated protein GRASP is required for unconventional  
761 protein secretion during development. *Cell* **130**, 524-534 (2007).
- 762 4. Fontana, N.A., Fonseca-Maldonado, R., Mendes, L.F.S., Meleiro, L.P. & Costa, A.J. The  
763 yeast GRASP Grh1 displays a high polypeptide backbone mobility along with an  
764 amyloidogenic behavior. *Scientific Reports* **8**(2018).
- 765 5. Chiritoiu, M., Brouwers, N., Turacchio, G., Pirozzi, M. & Malhotra, V. GRASP55 and UPR  
766 Control Interleukin-1 beta Aggregation and Secretion. *Developmental Cell* **49**, 145-  
767 (2019).
- 768 6. Gee, H.Y., Noh, S.H., Tang, B.L., Kim, K.H. & Lee, M.G. Rescue of Delta F508-CFTR  
769 Trafficking via a GRASP-Dependent Unconventional Secretion Pathway. *Cell* **146**, 746-  
770 760 (2011).
- 771 7. Schotman, H., Karhinen, L. & Rabouille, C. dGRASP-mediated noncanonical integrin  
772 secretion is required for Drosophila epithelial remodeling. *Developmental Cell* **14**, 171-  
773 182 (2008).
- 774 8. Bruns, C., McCaffery, J.M., Curwin, A.J., Duran, J.M. & Malhotra, V. Biogenesis of a novel  
775 compartment for autophagosome-mediated unconventional protein secretion. *Journal*  
776 *of Cell Biology* **195**, 979-992 (2011).
- 777 9. Son, S.M. et al. Insulin-degrading enzyme secretion from astrocytes is mediated by an  
778 autophagy-based unconventional secretory pathway in Alzheimer disease. *Autophagy*  
779 **12**, 784-800 (2016).
- 780 10. Dupont, N. et al. Autophagy-based unconventional secretory pathway for extracellular  
781 delivery of IL-1 beta. *Embo Journal* **30**, 4701-4711 (2011).
- 782 11. Ahat, E., Li, J. & Wang, Y.Z. New Insights Into the Golgi Stacking Proteins. *Frontiers in Cell*  
783 *and Developmental Biology* **7**(2019).
- 784 12. Mendes, L.F.S., Fontana, N.A., Reddy, S.T., Uversky, V.N. & Costa, A.J. The exquisite  
785 structural biophysics of the Golgi Reassembly and Stacking Proteins. *International*  
786 *Journal of Biological Macromolecules* **164**, 3632-3644 (2020).
- 787 13. Wu, H., Li, T. & Zhao, J. GRASP55: A Multifunctional Protein. *Current Protein & Peptide*  
788 *Science* **21**, 544-552 (2020).
- 789 14. Zhang, X.Y. & Wang, Y.Z. Nonredundant Roles of GRASP55 and GRASP65 in the Golgi  
790 Apparatus and Beyond. *Trends in Biochemical Sciences* **45**, 1065-1079 (2020).
- 791 15. Rabouille, C. & Linstedt, A. GRASP: A Multitasking Tether. *Frontiers in Cell and*  
792 *Developmental Biology* **4**(2016).
- 793 16. Zhang, X.Y. & Wang, Y.Z. GRASPs in Golgi Structure and Function. *Frontiers in Cell and*  
794 *Developmental Biology* **3**(2016).
- 795 17. Mendes, L.F.S. et al. The GRASP domain in golgi reassembly and stacking proteins:  
796 differences and similarities between lower and higher Eukaryotes. *Febs Journal* **286**,  
797 3340-3358 (2019).
- 798 18. Vinke, F.P., Grieve, A.G. & Rabouille, C. The multiple facets of the Golgi reassembly  
799 stacking proteins. *Biochemical Journal* **433**, 423-433 (2011).
- 800 19. Barr, F.A., Nakamura, N. & Warren, G. Mapping the interaction between GRASP65 and  
801 GM130, components of a protein complex involved in the stacking of Golgi cisternae.  
802 *Embo Journal* **17**, 3258-3268 (1998).

- 803 20. Barr, F.A., Puype, M., Vandekerckhove, J. & Warren, G. GRASP65, a protein involved in  
804 the stacking of Golgi cisternae. *Cell* **91**, 253-262 (1997).
- 805 21. Shorter, J. et al. GRASP55, a second mammalian GRASP protein involved in the stacking  
806 of Golgi cisternae in a cell-free system. *Embo Journal* **18**, 4949-4960 (1999).
- 807 22. Zhang, Y.J. & Seemann, J. Rapid degradation of GRASP55 and GRASP65 reveals their  
808 immediate impact on the Golgi structure. *Journal of Cell Biology* **220**(2020).
- 809 23. Grond, R. et al. The function of GORASPs in Golgi apparatus organization in vivo. *J Cell*  
810 *Biol* **219**(2020).
- 811 24. Feng, Y. et al. Structural Insight into Golgi Membrane Stacking by GRASP65 and GRASP55  
812 Proteins. *Journal of Biological Chemistry* **288**, 28418-28427 (2013).
- 813 25. Mendes, L.F.S. et al. Conformational flexibility of GRASPs and their constituent PDZ  
814 subdomains reveals structural basis of their promiscuous interactome. *Febs Journal* **287**,  
815 3255-3272 (2020).
- 816 26. Mendes, L.F.S. et al. New structural insights into Golgi Reassembly and Stacking Protein  
817 (GRASP) in solution. *Scientific Reports* **6**(2016).
- 818 27. Mendes, L.F.S., Basso, L.G.M., Kumagai, P.S., Fonseca-Maldonado, R. & Costa, A.J.  
819 Disorder-to-order transitions in the molten globule-like Golgi Reassembly and Stacking  
820 Protein. *Biochimica Et Biophysica Acta-General Subjects* **1862**, 855-865 (2018).
- 821 28. Ayala, I., Mascanzoni, F. & Colanzi, A. GRASP65-mediated control of the Golgi structure  
822 is crucial for G2/M transition. *Molecular Biology of the Cell* **29**(2018).
- 823 29. Tang, D., Yuan, H. & Wang, Y. The Role of GRASP65 in Golgi Cisternal Stacking and Cell  
824 Cycle Progression. *Traffic* **11**, 827-842 (2010).
- 825 30. Lane, J.D. et al. Caspase-mediated cleavage of the stacking protein GRASP65 is required  
826 for Golgi fragmentation during apoptosis. *Journal of Cell Biology* **156**, 495-509 (2002).
- 827 31. Fontana, N.A., Rosse, A.D., Watts, A., Coelho, P.S.R. & Costa-Filho, A.J. *In vivo* amyloid-  
828 like fibrils produced under stress. *bioRxiv*, 2021.02.02.429251 (2021).
- 829 32. Lee, I. et al. Membrane adhesion dictates Golgi stacking and cisternal morphology.  
830 *Proceedings of the National Academy of Sciences of the United States of America* **111**,  
831 1849-1854 (2014).
- 832 33. Seemann, J., Jokitalo, E., Pypaert, M. & Warren, G. Matrix proteins can generate the  
833 higher order architecture of the Golgi apparatus. *Nature* **407**, 1022-1026 (2000).
- 834 34. Rebane, A.A. et al. Liquid-liquid phase separation of the Golgi matrix protein GM130.  
835 *Febs Letters* **594**, 1132-1144 (2020).
- 836 35. Ziltener, P., Rebane, A.A., Graham, M., Ernst, A.M. & Rothman, J.E. The golgin family  
837 exhibits a propensity to form condensates in living cells. *Febs Letters*.
- 838 36. Reddy, S.T., Uversky, V.N. & Costa-Filho, A.J. Nucleation-dependent amyloid fibrillation  
839 of human GRASP55 in aqueous solution. *European Biophysics Journal with Biophysics*  
840 *Letters* **49**, 133-143 (2020).
- 841 37. Eme, L., Sharpe, S.C., Brown, M.W. & Roger, A.J. On the Age of Eukaryotes: Evaluating  
842 Evidence from Fossils and Molecular Clocks. *Cold Spring Harbor Perspectives in Biology*  
843 **6**(2014).
- 844 38. Barlow, L.D., Nyvltova, E., Aguilar, M., Tachezy, J. & Dacks, J.B. A sophisticated,  
845 differentiated Golgi in the ancestor of eukaryotes. *Bmc Biology* **16**(2018).
- 846 39. Kyte, J. & Doolittle, R.F. A SIMPLE METHOD FOR DISPLAYING THE HYDROPATHIC  
847 CHARACTER OF A PROTEIN. *Journal of Molecular Biology* **157**, 105-132 (1982).
- 848 40. Cilia, E., Pancsa, R., Tompa, P., Lenaerts, T. & Vranken, W.F. From protein sequence to  
849 dynamics and disorder with DynaMine. *Nature Communications* **4**(2013).
- 850 41. Cilia, E., Pancsa, R., Tompa, P., Lenaerts, T. & Vranken, W.F. The DynaMine webserver:  
851 predicting protein dynamics from sequence. *Nucleic Acids Research* **42**, W264-W270  
852 (2014).
- 853 42. Wilkins, M.R. et al. Protein identification and analysis tools in the ExPASy server. *2-D*  
854 *Proteome Analysis Protocols* **112**, 531-552 (1999).

- 855 43. Ferreira, D.U., Hegler, J.A., Komives, E.A. & Wolynes, P.G. Localizing frustration in native  
856 proteins and protein assemblies. *Proceedings of the National Academy of Sciences of the*  
857 *United States of America* **104**, 19819-19824 (2007).
- 858 44. Ferreira, D.U., Hegler, J.A., Komives, E.A. & Wolynes, P.G. On the role of frustration in  
859 the energy landscapes of allosteric proteins. *Proceedings of the National Academy of*  
860 *Sciences of the United States of America* **108**, 3499-3503 (2011).
- 861 45. Zhao, J., Li, B., Huang, X., Morelli, X. & Shi, N. Structural Basis for the Interaction between  
862 Golgi Reassembly-stacking Protein GRASP55 and Golgin45. *Journal of Biological*  
863 *Chemistry* **292**, 2956-2965 (2017).
- 864 46. Hu, F. et al. Structural Basis for the Interaction between the Golgi Reassembly-stacking  
865 Protein GRASP65 and the Golgi Matrix Protein GM130. *Journal of Biological Chemistry*  
866 **290**, 26373-26382 (2015).
- 867 47. Parra, R.G. et al. Protein Frustratometer 2: a tool to localize energetic frustration in  
868 protein molecules, now with electrostatics. *Nucleic Acids Research* **44**, W356-W360  
869 (2016).
- 870 48. Ashkenazy, H. et al. ConSurf 2016: an improved methodology to estimate and visualize  
871 evolutionary conservation in macromolecules. *Nucleic Acids Research* **44**, W344-W350  
872 (2016).
- 873 49. Stringer, C. The origin and evolution of Homo sapiens. *Philosophical Transactions of the*  
874 *Royal Society B-Biological Sciences* **371**(2016).
- 875 50. Morris, S.C. The fossil record and the early evolution of the Metazoa. *Nature* **361**, 219-  
876 225 (1993).
- 877 51. Parfrey, L.W., Lahr, D.J.G., Knoll, A.H. & Katz, L.A. Estimating the timing of early  
878 eukaryotic diversification with multigene molecular clocks. *Proceedings of the National*  
879 *Academy of Sciences of the United States of America* **108**, 13624-13629 (2011).
- 880 52. Bologna, G., Yvon, C., Duvaud, S. & Veuthey, A.L. N-Terminal myristoylation predictions  
881 by ensembles of neural networks. *Proteomics* **4**, 1626-1632 (2004).
- 882 53. Bachert, C. & Linstedt, A.D. Dual Anchoring of the GRASP Membrane Tether Promotes  
883 trans Pairing. *Journal of Biological Chemistry* **285**, 16294-16301 (2010).
- 884 54. Kava, E., Mendes, L.F.S., Batista, M.R.B. & Costa-Filho, A.J. Myristoylation and its effects  
885 on the human Golgi Reassembly and Stacking Protein 55. *bioRxiv*, 2021.06.22.449421  
886 (2021).
- 887 55. Reddy, S.T., Uversky, V.N. & Costa, A.J. Biophysical characterization of intrinsically  
888 disordered human Golgi matrix protein GRASP65. *International Journal of Biological*  
889 *Macromolecules* **162**, 1982-1993 (2020).
- 890 56. Boyko, S., Surewicz, K. & Surewicz, W.K. Regulatory mechanisms of tau protein  
891 fibrillation under the conditions of liquid-liquid phase separation. *Proceedings of the*  
892 *National Academy of Sciences of the United States of America* **117**, 31882-31890 (2020).
- 893 57. Babinchak, W.M. et al. The role of liquid-liquid phase separation in aggregation of the  
894 TDP-43 low-complexity domain. *Journal of Biological Chemistry* **294**, 6306-6317 (2019).
- 895 58. Ray, S. et al. alpha-Synuclein aggregation nucleates through liquid-liquid phase  
896 separation. *Nature Chemistry* **12**(2020).
- 897 59. Wegmann, S. et al. Tau protein liquid-liquid phase separation can initiate tau  
898 aggregation. *Embo Journal* **37**(2018).
- 899 60. Fuxreiter, M. & Vendruscolo, M. Generic nature of the condensed states of proteins.  
900 *Nature Cell Biology* **23**, 587-594 (2021).
- 901 61. Ziaunys, M., Sneideris, T. & Smirnovas, V. Exploring the potential of deep-blue  
902 autofluorescence for monitoring amyloid fibril formation and dissociation. *PeerJ*  
903 **7**(2019).
- 904 62. Guptasarma, P. Solution-state characteristics of the ultraviolet A-induced visible  
905 fluorescence from proteins. *Archives of Biochemistry and Biophysics* **478**, 127-129  
906 (2008).

- 907 63. Chan, F.T.S. et al. Protein amyloids develop an intrinsic fluorescence signature during  
908 aggregation. *Analyst* **138**, 2156-2162 (2013).
- 909 64. Sormanni, P., Aprile, F.A. & Vendruscolo, M. The CamSol Method of Rational Design of  
910 Protein Mutants with Enhanced Solubility. *Journal of Molecular Biology* **427**, 478-490  
911 (2015).
- 912 65. Sormanni, P. & Vendruscolo, M. Protein Solubility Predictions Using the CamSol Method  
913 in the Study of Protein Homeostasis. *Cold Spring Harbor Perspectives in Biology*  
914 **11**(2019).
- 915 66. Joshi, G., Chi, Y.J., Huang, Z.P. & Wang, Y.Z. A beta-induced Golgi fragmentation in  
916 Alzheimer's disease enhances A beta production. *Proceedings of the National Academy  
917 of Sciences of the United States of America* **111**, E1230-E1239 (2014).
- 918 67. Wang, F., Chen, X., Yuan, D., Yi, Y. & Luo, Y. Golgi reassembly and stacking protein 65  
919 downregulation is required for the anti-cancer effect of dihydromyricetin on human  
920 ovarian cancer cells. *Plos One* **14**(2019).
- 921 68. Nüchel, J. et al. An mTORC1-GRASP55 signaling axis controls unconventional secretion  
922 to reshape the extracellular proteome upon stress. *Mol Cell* (2021).
- 923 69. Zhang, X.Y. & Wang, Y.Z. The Golgi stacking protein GORASP2/GRASP55 serves as an  
924 energy sensor to promote autophagosome maturation under glucose starvation.  
925 *Autophagy* **14**, 1649-1651 (2018).
- 926 70. Zhang, X. et al. GRASP55 Senses Glucose Deprivation through O-GlcNAcylation to  
927 Promote Autophagosome-Lysosome Fusion. *Developmental Cell* **45**, 245-+ (2018).
- 928 71. Tang, D. et al. Mena-GRASP65 interaction couples actin polymerization to Golgi ribbon  
929 linking. *Molecular Biology of the Cell* **27**, 137-152 (2016).
- 930 72. Li, J., Tang, D., Ireland, S.C. & Wang, Y. DjA1 maintains Golgi integrity via interaction with  
931 GRASP65. *Molecular Biology of the Cell* **30**, 478-490 (2019).
- 932 73. Cheng, J.P.X. et al. Caspase cleavage of the Golgi stacking factor GRASP65 is required for  
933 Fas/CD95-mediated apoptosis. *Cell Death & Disease* **1**(2010).
- 934 74. Sutterlin, C., Polishchuk, R., Pecot, M. & Malhotra, V. The Golgi-associated protein  
935 GRASP65 regulates spindle dynamics and is essential for cell division. *Molecular Biology  
936 of the Cell* **16**, 3211-3222 (2005).
- 937 75. Ayala, I., Crispino, R. & Colanzi, A. GRASP65 controls Golgi position and structure during  
938 G2/M transition by regulating the stability of microtubules. *Traffic* **20**, 785-802 (2019).
- 939 76. Wei, J.-H. & Seemann, J. Unraveling the Golgi Ribbon. *Traffic* **11**, 1391-1400 (2010).
- 940 77. Xiang, Y. et al. Regulation of protein glycosylation and sorting by the Golgi matrix  
941 proteins GRASP55/65. *Nature Communications* **4**(2013).
- 942 78. Zhang, X. & Wang, Y. GRASP55 senses energy deprivation through O-GlcNAcylation to  
943 promote autophagosome-lysosome fusion. *Molecular Biology of the Cell* **28**(2017).
- 944 79. Sammut, S.J., Finn, R.D. & Bateman, A. Pfam 10 years on: 10 000 families and still  
945 growing. *Briefings in Bioinformatics* **9**, 210-219 (2008).
- 946 80. Mistry, J. et al. Pfam: The protein families database in 2021. *Nucleic Acids Research* **49**,  
947 D412-D419 (2021).
- 948 81. Sievers, F. & Higgins, D.G. Clustal Omega for making accurate alignments of many  
949 protein sequences. *Protein Science* **27**, 135-145 (2018).
- 950 82. Madeira, F. et al. The EMBL-EBI search and sequence analysis tools APIs in 2019. *Nucleic  
951 Acids Research* **47**, W636-W641 (2019).
- 952 83. Liu, Y., Schmidt, B. & Maskell, D.L. MSAProbs: multiple sequence alignment based on  
953 pair hidden Markov models and partition function posterior probabilities.  
954 *Bioinformatics* **26**, 1958-1964 (2010).
- 955 84. Stamatakis, A., Ludwig, T. & Meier, H. RAXML-III: a fast program for maximum likelihood-  
956 based inference of large phylogenetic trees. *Bioinformatics* **21**, 456-463 (2005).

- 957 85. Hanson-Smith, V. & Johnson, A. PhyloBot: A Web Portal for Automated Phylogenetics,  
958 Ancestral Sequence Reconstruction, and Exploration of Mutational Trajectories. *Plos*  
959 *Computational Biology* **12**(2016).
- 960 86. Yang, Z. PAML 4: Phylogenetic analysis by maximum likelihood. *Molecular Biology and*  
961 *Evolution* **24**, 1586-1591 (2007).
- 962 87. Hanson-Smith, V., Kolaczkowski, B. & Thornton, J.W. Robustness of Ancestral Sequence  
963 Reconstruction to Phylogenetic Uncertainty. *Molecular Biology and Evolution* **27**, 1988-  
964 1999 (2010).
- 965 88. Fonseca, N.J., Afonso, M.Q.L., Carrijo, L. & Bleicher, L. CONAN: A web application to  
966 detect specificity determinants and functional sites by amino acids co-variation network  
967 analysis. *Bioinformatics* (2020).
- 968 89. Tumminello, M., Micciche, S., Lillo, F., Piilo, J. & Mantegna, R.N. Statistically Validated  
969 Networks in Bipartite Complex Systems. *Plos One* **6**(2011).
- 970 90. Jumper, J. et al. Highly accurate protein structure prediction with AlphaFold. *Nature*  
971 (2021).
- 972 91. Yang, J.Y. & Zhang, Y. I-TASSER server: new development for protein structure and  
973 function predictions. *Nucleic Acids Research* **43**, W174-W181 (2015).
- 974 92. Waterhouse, A. et al. SWISS-MODEL: homology modelling of protein structures and  
975 complexes. *Nucleic Acids Research* **46**, W296-W303 (2018).
- 976
